# Supplementary material for: Association of Inpatient Use of Angiotensin-Converting Enzyme Inhibitors and Angiotensin II Receptor Blockers With Mortality Among Patients With Hypertension Hospitalized With COVID-19
Source: PubMed Central journal article supplement (PMC7265882; doi:10.1161/circresaha.120.317134), 2020-06-02
Supplement: res-126-1671-s001.pdf [file res-126-1671-s001.pdf]

## Supplemental Materials

P Zhang, L Zhu, J Cai *et al.* Association of inpatient use of angiotensin converting enzyme inhibitors and angiotensin II receptor blockers with mortality among patients with hypertension hospitalized with COVID-19

**Online Table I.** Diagnostic criteria of COVID-19 (Exclusive for patients from Hubei Province) and septic shock in the study

**Online Table II.** The normal range of serum CRP, procalcitonin, creatinine, D-dimer, and platelet test in study hospitals

**Online Table III.** Clinical characteristics, laboratory examination and CT features of patients on admission

**Online Table IV.** Characteristics of ACEI/ARB and non-ACEI/ARB groups among patients with hypertension taking antihypertensive drugs before and after propensity score-matching

**Online Table V** Hazard ratio and incidence rate ratios for association between ACEI/ARB and COVID-19 outcomes among patients with hypertension taking antihypertensive drugs in mixed-effect Cox model after propensity score-matching

**Online Table VI.** In-hospital management of participants

**Online Table VII.** Hazard Ratio for primary and secondary outcome in hypertension and non-hypertension group

**Online Figure I** Dynamic change of blood pressure and mean arterial pressure of patients with hypertension treated with ACEI/ARB or without ACEI/ARB.

**Online Figure II.** Kaplan-Meier Curves for cumulative probability of COVID-19 mortality among individuals with inpatient use of ACEI/ARB (ACEI/ARB cohort) or taking other antihypertensive drugs (non-ACEI/ARB cohort) in propensity score-matched analysis.

**Online Figure III.** The 28-day Kaplan-Meier Curves of hypertensive and non-hypertensive cohort.

This supplementary material has been provided by the authors to give readers additional information about their work.

**Online Table I** Diagnostic criteria of COVID-19 (Exclusive for patients from Hubei Province) and septic shock in the study

|                                                                                                                |                                                                                                                                                                                                                                  |
|----------------------------------------------------------------------------------------------------------------|----------------------------------------------------------------------------------------------------------------------------------------------------------------------------------------------------------------------------------|
| <b>COVID-19 diagnosis:</b> Any a positive result on below, irrespective of clinical signs and symptoms         |                                                                                                                                                                                                                                  |
| (1) Typical CT manifestations of viral pneumonia                                                               | Primary reported findings on CT: 1. bilateral, subpleural or peripheral ground-glass opacities; 2. lobular septal thickening; 3. air space consolidation; 4. bronchovascular thickening in the lesion; 5.traction bronchiectasis |
| (2) RT-PCR <sup>*</sup> for COVID-19 nasal and pharyngeal swab specimens or blood sample                       | +                                                                                                                                                                                                                                |
| <b>Septic shock definition:</b> Any a positive result on below                                                 |                                                                                                                                                                                                                                  |
| (1) Persisting hypotension despite volume resuscitation, requiring vasopressors to maintain MAP $\geq$ 65 mmHg | Hypotension: 1. systolic blood pressure <90 mmHg; 2. MAP < 65 mmHg; 3. a drop of > 40 mmHg of systolic blood pressure from baseline                                                                                              |
| (2) Serum lactate level > ULN <sup>†</sup> and using vasoactive drug (excluding single rescue medication)      | +                                                                                                                                                                                                                                |

SBP <90 mm Hg, or mean arterial pressure <65 mm Hg, or SBP decrease >40 mm Hg from baseline, or serum lactate >2.0 mmol/L

<sup>\*</sup>The laboratory RT-PCR procedures and cycle threshold (Ct) denoted positive findings varied from suppliers. PCR positive defined as a Ct of less than indicated threshold in each instruction.

<sup>†</sup>ULN, upper limit of normal. The ULN was defined according to the criteria by the laboratory standards in each hospital.

**Online Table II** The normal range of serum CRP, procalcitonin, creatinine, D-dimer, and platelet test in study hospitals

|        | Normal Range for Serum Test |                                 |                |                            |                   |
|--------|-----------------------------|---------------------------------|----------------|----------------------------|-------------------|
|        | CRP                         | Procalcitonin                   | Creatinine     | D-dimer                    | Platelets         |
| Site 1 | 0-10(mg/L)                  | 0-0.05(ng/ml)                   | 64-104(umol/L) | 0-500(ng/ml)               | 0.50-2.50(mmol/L) |
| Site 2 | 0-10(mg/L)                  | 0-0.10(ng/ml)                   | 41-81(umol/L)  | 0-0.55(mg/L)               | 0.50-1.50(mmol/L) |
| Site 3 | 0-5(mg/L)                   | 0-5.00(ug/L)                    | 53-106(umol/L) | 0-0.55(mg/L)<br>/0-1(mg/L) | 1.65-2.90(mmol/L) |
| Site 4 | 0-5(mg/L)                   | 0-0.05(ng/ml)                   | 40-105(umol/L) | 0-0.50(mg/L)               | 1.65-2.90(mmol/L) |
| Site 5 | 0-10(mg/L)                  | 0-0.10(ng/ml)                   | 57-97(umol/L)  | 0-0.24(mg/L)               | 0.50-2.20(mmol/L) |
| Site 6 | 0-3(mg/L)                   | 0-0.50(ng/mL)                   | 57-111(umol/L) | 0-1(ug/mL)                 | 0.50-2.20(mmol/L) |
| Site 7 | 0-4(mg/L)                   | 0-0.05(ng/ml)                   | 64-104(umol/L) | 0-0.55(mg/L)               | 0.50-2.50(mmol/L) |
| Site 8 | 0-10(mg/L)/0-<br>5(mg/L)    | 0-0.10(ng/ml)<br>/0-0.50(ng/mL) | 38-120(umol/L) | 0-243(ng/ml)               | 0.00-3.00(mmol/L) |
| Site 9 | 0-10(mg/L)                  | 0-0.50(ng/mL)                   | 35-110(umol/L) | 0-0.24(ug/ml)              | 0.50-2.20(mmol/L) |

Abbreviations: CRP, C-reactive protein. [Site 1, Zhongnan Hospital of Wuhan University](#); [Site 2, Renmin Hospital of Wuhan University](#); [Site 3, Wuhan First Hospital](#); [Site 4, Wuhan Third Hospital](#); [Site 5, Wuhan Seventh Hospital](#); [Site 6, Wuhan Ninth Hospital](#); [Site 7, Thunder Mountain Hospital](#); [Site 8, Huanggang Central Hospital](#); [Site 9, Central Hospital of Enshi Tujia and Miao Autonomous Prefecture](#).

**Online Table III** Clinical characteristics, laboratory data and CT features of patients on admission

| Parameters                                              | Total (n=3430)  | Hypertension <sup>†</sup><br>(n=1128) | Non-hypertension <sup>‡</sup><br>(n=2302) | P value <sup>§</sup> |
|---------------------------------------------------------|-----------------|---------------------------------------|-------------------------------------------|----------------------|
| <b>Clinical characteristics</b>                         |                 |                                       |                                           |                      |
| Age, median(IQR), y                                     | 57(45-65)       | 64(56-69)                             | 52(40-62)                                 | 1.40E-107            |
| Male gender, n (%)                                      | 1675(48.8)      | 603(53.5)                             | 1072(46.6)                                | 1.73E-4              |
| Female gender, n (%)                                    | 1755(51.2)      | 525(46.5)                             | 1230(53.4)                                | 1.73E-4              |
| Heart rate, median(IQR), bpm                            | 82(76-93)       | 84(78-96)                             | 81(76-92)                                 | 5.21E-4              |
| Respiratory rate, median(IQR)                           | 20(19-21)       | 20(19-22)                             | 20(19-21)                                 | 0.004                |
| SBP, median(IQR), mmHg                                  | 126(119-136)    | 132(120-145)                          | 124(117-132)                              | 1.70E-42             |
| DBP, median(IQR), mmHg                                  | 78(70-83)       | 80(72-87)                             | 77(70-81)                                 | 2.06E-15             |
| Days from symptom onset to hospitalization, median(IQR) | 10(7-15)        | 10(7-15)                              | 10(6-14)                                  | 1.26E-4              |
| Fever, n(%)                                             | 2534(73.9)      | 826(73.2)                             | 1708(74.2)                                | 0.57                 |
| Cough, n(%)                                             | 2331(68.0)      | 775(68.7)                             | 1556(67.6)                                | 0.54                 |
| Fatigue, n(%)                                           | 1228(35.8)      | 428(37.9)                             | 800(34.8)                                 | 0.07                 |
| Dyspnea, n(%)                                           | 719(21.0)       | 298(26.4)                             | 421(18.3)                                 | 5.01E-8              |
| <b>Comorbidities</b>                                    |                 |                                       |                                           |                      |
| Diabetes, n(%)                                          | 388(11.3)       | 240(21.3)                             | 148(6.4)                                  | 9.76E-38             |
| Coronary heart disease, n(%)                            | 178(5.2)        | 131(11.6)                             | 47(2.0)                                   | 4.34E-32             |
| Chronic liver disease, n(%)                             | 62(1.8)         | 21(1.9)                               | 41(1.8)                                   | 0.98                 |
| Cerebrovascular diseases, n(%)                          | 50(1.5)         | 41(3.6)                               | 9(0.4)                                    | 2.99E-13             |
| Chronic renal diseases, n(%)                            | 52(1.5)         | 35(3.1)                               | 17(0.7)                                   | 2.28E-7              |
| COPD, n(%)                                              | 19(0.6)         | 6(0.5)                                | 13(0.6)                                   | 1.00                 |
| <b>Chest CT</b>                                         |                 |                                       |                                           |                      |
| Unilateral lesion, n/N(%)                               | 326/3216(10.1)  | 58/1068(5.4)                          | 268/2148(12.5)                            | 6.70E-10             |
| Bilateral lesions, n/N (%)                              | 2721/3216(84.6) | 941/1068(88.1)                        | 1780/2148(82.9)                           | 1.30E-4              |
| <b>Laboratory examination</b>                           |                 |                                       |                                           |                      |
| Leukocytocount>9.5, 10 <sup>9</sup> /L, n/N (%)         | 267/3191(8.4)   | 123/1066(11.5)                        | 144/2125(6.8)                             | 6.35E-6              |
| Neutrophil count > 6.3, 9.5 10 <sup>9</sup> /L, n/N (%) | 442/3186(13.9)  | 211/1065(19.8)                        | 231/2121(10.9)                            | 9.25E-12             |
| Lymphocyte count < 1.1, 9.5 10 <sup>9</sup> /L, n/N (%) | 1361/3187(42.7) | 508/1066(47.7)                        | 853/2121(40.2)                            | 7.27E-5              |
| C-reactive protein increase>ULN <sup>*</sup> , n/N (%)  | 1361/2226(61.1) | 521/774(67.3)                         | 840/1452(57.9)                            | 1.59E-5              |
| Procalcitonin level increase>ULN <sup>*</sup> , n/N (%) | 633/2503(25.3)  | 277/871(31.8)                         | 356/1632(21.8)                            | 5.70E-8              |
| ALT increase> 40 U/L, n/N (%)                           | 555/3141(17.7)  | 203/1056(19.2)                        | 352/2085(16.9)                            | 0.12                 |
| AST increase> 40 U/L, n/N (%)                           | 718/3144(22.8)  | 287/1056(27.2)                        | 431/2088(20.6)                            | 4.53E-5              |
| Creatinine>ULN <sup>*</sup> , n/N (%)                   | 178/3009(5.9)   | 106/1011(10.5)                        | 72/1998(3.6)                              | 7.70E-14             |
| D-dimer> ULN <sup>*</sup> , n/N (%)                     | 1055/2567(41.1) | 459/892(51.4)                         | 596/1675(35.6)                            | 9.77E-15             |
| Platelets < ULN, n/N (%)                                | 316/3192(9.21)  | 188/2126(8.5)                         | 128/1066(12.0)                            | 0.005                |
| K <sup>+</sup> < 3.5 mmol/L, n/N (%)                    | 690/3132(22.0)  | 284/1052(27.0)                        | 406/2080(19.5)                            | 2.33E-6              |
| LDL-c, mmol/L, median (IQR)                             | 2.3 (1.9-2.8)   | 2.3 (1.8-2.8)                         | 2.3(1.9-2.8)                              | 0.10                 |
|                                                         | [n=2311]        | [n=872]                               | [n=1439]                                  |                      |
| SaO <sub>2</sub> , <95%, n/N (%)                        | 398/2442(16.3)  | 176/830(21.2)                         | 222/1612(13.8)                            | 3.27E-6              |
| Blood glucose, median (IQR), mmol/L                     | 5.7(4.9-7.3)    | 6.2(5.2-8.3)                          | 5.5(4.8-6.8)                              | 8.89E-24             |
|                                                         | [n = 2797]      | [n = 966]                             | [n = 1831]                                |                      |

Abbreviations: SBP, Systolic blood pressure; DBP, Diastolic blood pressure; COPD, Chronic obstructive pulmonary disease; ALT, alanine transaminase; AST, Aspartate transaminase; IQR, Interquartile range.

\*Upper limit of normal (ULN) was defined according to criteria in each hospital and normal ranges of tests in each hospital were provided in Online Table 2.

†1128 participants with a history of hypertension enrolled in the hypertension cohort.

‡2302 participants without a history of hypertension enrolled in the non-hypertension cohort.

§The *P* values were calculated by Mann-Whitney U test for continuous variables, while categorical variables were compared by Fisher's exact test or Chi-square test between Hypertension and Non-hypertension group.

**Online Table IV** Characteristics of ACEI/ARB and non-ACEI/ARB groups among patients with hypertension taking antihypertensive drugs before and after propensity score-matching.

| Parameters                                              | Unmatched                          |                                        |                 | Matched <sup>a</sup>               |                                        |                 |
|---------------------------------------------------------|------------------------------------|----------------------------------------|-----------------|------------------------------------|----------------------------------------|-----------------|
|                                                         | ACEI/ARB <sup>†</sup><br>(n = 188) | Non-ACEI/ARB <sup>‡</sup><br>(n = 557) | SD <sup>§</sup> | ACEI/ARB <sup>†</sup><br>(n = 181) | Non-ACEI/ARB <sup>‡</sup><br>(n = 181) | SD <sup>§</sup> |
| <b>Clinical characteristics on admission</b>            |                                    |                                        |                 |                                    |                                        |                 |
| Age, median(IQR)                                        | 64 (55-68)                         | 64 (57-68)                             | -0.061          | 64(56-68)                          | 64(57-69)                              | -0.056          |
| Male gender, n (%)                                      | 100(53.2)                          | 277(49.7)                              | 0.069           | 95(52.5)                           | 92(50.8)                               | 0.033           |
| Female gender, n (%)                                    | 88(46.8)                           | 280(50.3)                              | -0.069          | 86(47.5)                           | 89(49.2)                               | -0.033          |
| Heart rate, median(IQR)                                 | 82.0(76.0-95.3)                    | 82.0(78.0-94.8)                        | -0.014          | 82(76.3-95.0)                      | 80(76.3-94.0)                          | 0.036           |
| Respiratory rate, median(IQR)                           | 20.0(19.0-21.0)                    | 20.0(19.0-22.0)                        | -0.022          | 20(19.0-21.0)                      | 20(19.0-21.8)                          | 0.081           |
| SBP, median(IQR)                                        | 132.5(123.0-145.8)                 | 134.0(121.0-145.0)                     | 0.019           | 133.5(124.0-147.3)                 | 132(120.0-145.0)                       | 0.045           |
| DBP, median(IQR)                                        | 80.0(72.0-87.8)                    | 80.0(73.0-86.0)                        | -0.010          | 80(72.0-88.0)                      | 80(73.8-88.0)                          | -0.025          |
| Symptom onset to admission, median(IQR), day            | 10.0(7.0-15.0)                     | 10.0(7.0-15.0)                         | -0.078          | 10(7-15)                           | 9.5(6-15)                              | -0.031          |
| Fever, n(%)                                             | 126(67.0)                          | 411(73.8)                              | -0.149          | 125(69.1)                          | 119(65.8)                              | 0.071           |
| Cough, n(%)                                             | 122(64.9)                          | 379(68.0)                              | -0.067          | 118(65.2)                          | 113(62.4)                              | 0.058           |
| Fatigue, n(%)                                           | 65(34.6)                           | 216(38.8)                              | -0.087          | 62(34.3)                           | 70(38.7)                               | -0.092          |
| Dyspnea, n(%)                                           | 38(20.2)                           | 148(26.6)                              | -0.151          | 37(20.4)                           | 38(21.0)                               | -0.014          |
| <b>Comorbidities on admission</b>                       |                                    |                                        |                 |                                    |                                        |                 |
| Diabetes, n(%)                                          | 44(23.4)                           | 118(21.2)                              | 0.053           | 42(23.2)                           | 42(23.2)                               | 0.000           |
| Coronary heart disease, n(%)                            | 29(15.4)                           | 56(10.1)                               | 0.162           | 25(13.8)                           | 28(15.5)                               | -0.047          |
| Chronic renal diseases, n(%)                            | 7(3.7)                             | 19(3.4)                                | 0.017           | 7(3.9)                             | 8(4.4)                                 | -0.028          |
| Cerebrovascular diseases, n(%)                          | 5(2.7)                             | 18(3.2)                                | -0.034          | 5(2.8)                             | 5(2.8)                                 | 0.000           |
| Chronic liver disease, n(%)                             | 4(2.1)                             | 7(1.3)                                 | 0.068           | 4(2.2)                             | 4(2.2)                                 | 0.000           |
| Chronic obstructive pulmonary disease, n(%)             | 1(0.5)                             | 3(0.5)                                 | -0.001          | 1(0.6)                             | 1(0.6)                                 | 0.000           |
| <b>Chest CT on admission</b>                            |                                    |                                        |                 |                                    |                                        |                 |
| Unilateral lesion, n/N(%)                               | 16/173(9.3)                        | 27/525(5.1)                            | 0.159           | 14(8.4)                            | 12(7.1)                                | 0.050           |
| Bilateral lesions, n/N (%)                              | 146/173(84.4)                      | 474/525(90.3)                          | -0.178          | 143(86.1)                          | 150(88.8)                              | -0.079          |
| <b>Laboratory examination on admission</b>              |                                    |                                        |                 |                                    |                                        |                 |
| Leukocyte count > 9.5, 10 <sup>9</sup> /L, n/N (%)      | 22/183(12.0)                       | 55/527(10.4)                           | 0.050           | 22/177(12.4)                       | 17/175(9.7)                            | 0.087           |
| Neutrophil count > 6.3, 9.5 10 <sup>9</sup> /L, n/N (%) | 32/183(17.5)                       | 100/527(19.0)                          | -0.039          | 32/177(18.1)                       | 38/175(21.7)                           | -0.091          |
| Lymphocyte count <1.1, 9.5 10 <sup>9</sup> /L, n/N (%)  | 82/183(44.8)                       | 228/527(43.3)                          | 0.031           | 81/177(45.8)                       | 77/175(44.0)                           | 0.035           |

| Parameters                                               | Unmatched                          |                                        |        | Matched <sup>a</sup>               |                                        |        |
|----------------------------------------------------------|------------------------------------|----------------------------------------|--------|------------------------------------|----------------------------------------|--------|
|                                                          | ACEI/ARB <sup>†</sup><br>(N = 188) | Non-ACEI/ARB <sup>‡</sup><br>(N = 557) | SD     | ACEI/ARB <sup>†</sup><br>(N = 181) | Non-ACEI/ARB <sup>‡</sup><br>(N = 181) | SD     |
| C-reactive protein increase>ULN <sup>*</sup> , n/N (%)   | 78/133(58.7)                       | 242/374(64.7)                          | -0.125 | 78/129(60.5)                       | 70/119(58.8)                           | 0.033  |
| Procalcitonin level increase> ULN <sup>*</sup> , n/N (%) | 40/144(27.8)                       | 135/432(31.3)                          | -0.076 | 39/140(27.9)                       | 48/142(33.8)                           | -0.129 |
| ALT increase> 40 U/L, n/N (%)                            | 33/179(18.4)                       | 100/523(19.1)                          | -0.018 | 32/173(18.5)                       | 31/173(17.9)                           | 0.015  |
| AST increase> 40 U/L, n/N (%)                            | 40/179(22.4)                       | 133/523(25.4)                          | -0.072 | 39/173(22.5)                       | 41/173(23.7)                           | -0.027 |
| Creatinine>ULN <sup>a</sup> , n/N (%)                    | 14/166(8.4)                        | 49/504(9.7)                            | -0.045 | 14/160(8.8)                        | 19/166(11.5)                           | -0.090 |
| D-dimer> ULN <sup>a</sup> , n/N (%)                      | 67/149(45.0)                       | 240/445(53.9)                          | -0.180 | 67/144(46.5)                       | 76/145(52.4)                           | -0.118 |
| K <sup>+</sup> < 3.5 mmol/L, n/N (%)                     | 51/179(28.5)                       | 135/522(25.9)                          | 0.059  | 50/173(28.9)                       | 45/174(25.9)                           | 0.068  |
| Platelets < ULN, n/N (%)                                 | 22/183(12.02)                      | 50/477(9.49)                           | 0.058  | 22/177(12.43)                      | 18/175(10.29)                          | 0.048  |
| LDL-c, mmol/L, median (IQR)                              | 2.2(1.8-2.8)                       | 2.3(1.9-2.8)                           | -0.069 | 2.23(1.8-2.8)                      | 2.34(1.8-2.8)                          | 0.011  |
|                                                          | [n = 151]                          | [n = 426]                              |        | [n = 146]                          | [n = 142]                              |        |
| SaO <sub>2</sub> , <95%, n/N (%)                         | 30/138(21.7)                       | 84/413(20.3)                           | 0.034  | 29/132(22.0)                       | 28/134(20.9)                           | 0.026  |
| Blood glucose, median (IQR), mmol/L                      | 6.0(5.1-8.3)                       | 6.2(5.2-8.2)                           | 0.028  | 6.05(5.1-8.3)                      | 6.14(5.2-8.2)                          | 0.036  |
|                                                          | [n = 163]                          | [n = 483]                              |        | [n = 158]                          | [n = 163]                              |        |

Abbreviations: ACEI, angiotensin converting enzyme inhibitor; ARB, angiotensin II receptor blocker; SBP, Systolic blood pressure; DBP, Diastolic blood pressure; COPD, Chronic obstructive pulmonary disease; ALT, alanine transaminase; AST, Aspartate transaminase; IQR, Interquartile range.

<sup>\*</sup>Upper limit of normal (ULN) was defined according to criteria in each hospital and normal ranges of tests in each hospital were provided in Online Table 2.

<sup>†</sup>Patients with hypertension who taking ACEI and/or ARB during hospitalization were enrolled in the ACEI/ARB cohort. Patients discontinued treatment of hypertension due to inability to take medications or hypotension were not excluded from the cohort.

<sup>‡</sup>Patients with antihypertension drug who never taking ACEI and ARB during hospitalization were enrolled in the non-ACEI/ARB cohort.

<sup>§</sup>SD, Standardized differences be used to compare the mean of baseline covariate between ACEI/ARB and non-ACEI/ARB group.

**Online Table V** Hazard ratio and incidence rate ratios for association between ACEI/ARB and COVID-19 outcomes among patients with hypertension taking antihypertensive drugs in mixed-effect Cox model after propensity score-matching

| ACEI/ARB vs non-<br>ACEI/ARB | Mixed-effect Cox Model After PSM<br>in patients taking antihypertensive drugs (1:2) <sup>*</sup> |                 |                             |
|------------------------------|--------------------------------------------------------------------------------------------------|-----------------|-----------------------------|
|                              | IRD                                                                                              | HR(95%CI)       | <i>P</i> value <sup>†</sup> |
| All-cause mortality          | -0.36(-0.60,-0.12)                                                                               | 0.29(0.12,0.69) | 0.005                       |
| Septic shock                 | -0.31(-0.54,-0.09)                                                                               | 0.24(0.10,0.63) | 0.003                       |
| ARDS                         | -0.27(-0.64,0.10)                                                                                | 0.73(0.44,1.19) | 0.21                        |
| DIC                          | -0.14(-0.25,-0.03)                                                                               | <sub>‡</sub>    | <sub>‡</sub>                |
| Acute kidney injury          | -0.06(-0.28,0.16)                                                                                | 0.83(0.36,1.87) | 0.65                        |
| Acute heart injury           | -0.16(-0.47,0.14)                                                                                | 0.81(0.44,1.47) | 0.49                        |

Abbreviations: HR, Hazard ratio; CI, Confidence interval; IRD, incidence rate differences, an absolute difference in the incidence between two groups.

<sup>\*</sup>In the mixed-effect Cox model after propensity score matching, age, gender, cough, dyspnea, comorbidities (diabetes, coronary heart disease and chronic renal disease), CT-diagnosed lung lesions, and incidence of increased CRP and creatine were matched. Modeled center as a random effect in the multivariate analyses followed by adjustment for antiviral drug and lipid lowering drug.

<sup>†</sup>The *P* values were calculated by Fisher's exact test or  $\chi^2$  test.

<sup>‡</sup>The incidence of DIC was 0 in the ACEI/ARB cohort. HR in DIC was not calculated.



**Online Table VI** In-hospital management of participants

| Management                                  | Total<br>(N=3430) | Hypertension*<br>(n=1128) | Non-hypertension†<br>(n=2302) | P value <sup>  </sup> |
|---------------------------------------------|-------------------|---------------------------|-------------------------------|-----------------------|
| Traditional Chinese medicine%               | 2921(85.2)        | 978(86.7)                 | 1943(84.4)                    | 0.08                  |
| Antiviral drug, n (%)                       | 2872(83.7)        | 935(82.9)                 | 1937(84.1)                    | 0.38                  |
| Antibiotics drug, n (%)                     | 2524(73.6)        | 862(76.4)                 | 1662(72.2)                    | 0.01                  |
| Nasal cannula Oxygen inhalation‡, n (%)     | 2436(71.0)        | 887(78.6)                 | 1549(67.3)                    | 7.87E-12              |
| Systemic corticosteroids, n (%)             | 1185(34.6)        | 446(39.5)                 | 739(32.1)                     | 2.00E-5               |
| Immunoglobulin, n (%)                       | 918(26.8)         | 330(29.3)                 | 588(25.5)                     | 0.02                  |
| Antidiabetic drug, n (%)                    | 486(14.2)         | 281(24.9)                 | 205(8.91)                     | 2.85E-36              |
| Lipid lowering drug, n (%)                  | 214(6.2)          | 137(12.2)                 | 77(3.3)                       | 2.89E-23              |
| Vasoactive drug, n (%)                      | 220(6.4)          | 124(11.0)                 | 96(4.2)                       | 3.25E-14              |
| Noninvasive ventilation§, n (%)             | 206(6.0)          | 122(10.8)                 | 84(3.7)                       | 1.99E-16              |
| Invasive ventilation§, n (%)                | 96(2.8)           | 60(5.3)                   | 36(1.6)                       | 7.54E-10              |
| Antifungal medications, n (%)               | 81(2.4)           | 47(4.2)                   | 34(1.5)                       | 1.99E-6               |
| Renal replacement therapy,n(%)              | 19(0.6)           | 15(1.3)                   | 4(0.2)                        | 5.33E-5               |
| Extracorporeal membrane oxygenation§, n (%) | 7(0.2)            | 4(0.4)                    | 3(0.1)                        | 0.23                  |
| Anti-hypertensive drug, n (%)               |                   |                           |                               |                       |
| ACEI, n (%)                                 | 31(0.9)           | 31(2.8)                   | 0(0)                          | 6.29E-15              |
| ARB, n (%)                                  | 157(4.6)          | 157(13.9)                 | 0(0)                          | 2.62E-74              |
| CCB, n (%)                                  | 592(17.3)         | 592(52.5)                 | 0(0)                          | 1.12E-318             |
| Diuretic, n (%)                             | 300(8.8)          | 178(15.8)                 | 122(5.3)                      | 3.57E-24              |
| beta-blocker, n (%)                         | 334(9.7)          | 221(19.6)                 | 113(4.9)                      | 6.38E-42              |
| alpha-blocker, n (%)                        | 35(1.0)           | 25(2.2)                   | 10(0.4)                       | 2.63E-6               |

Abbreviations: CCB, calcium channel blockers; ACEI, angiotensin converting enzyme inhibitor; ARB, angiotensin II receptor blocker.

\* 1128 participants with a history of hypertension enrolled in the hypertension cohort.

†2302 participants without a history of hypertension enrolled in the non-hypertension cohort.

‡Nasal cannula oxygen inhalation was taken in isolation.

§Noninvasive ventilation, invasive ventilation, and extracorporeal membrane oxygenation are at mutually exclusive.

<sup>||</sup> The P values were calculated by Mann-Whitney U test for continuous variables, while categorical variables were compared by Fisher's exact test or Chi-square test.

**Online Table VII** Hazard Ratio for primary and secondary outcome in hypertension and non-hypertension group

| Hypertension vs non-hypertension | Unadjusted       |                             | Adjusted*       |                             |
|----------------------------------|------------------|-----------------------------|-----------------|-----------------------------|
|                                  | HR(95%CI)        | <i>P</i> value <sup>†</sup> | HR(95%CI)       | <i>P</i> value <sup>†</sup> |
| All-cause mortality              | 2.612(1.95,3.51) | 0.000                       | 1.41(1.03,1.94) | 0.03                        |
| Septic shock                     | 3.51(2.47,5.01)  | 0.000                       | 1.95(1.33,2.85) | 0.001                       |
| ARDS                             | 2.42(2.01,2.91)  | 0.000                       | 1.61(1.32,1.97) | 0.000                       |
| DIC                              | 5.84(2.60,13.11) | 0.000                       | 2.74(1.15,6.54) | 0.02                        |
| Acute kidney injury              | 4.08(2.62,6.34)  | 0.43                        | 2.55(1.58,4.12) | 0.000                       |
| Acute heart injury               | 3.05(2.34,3.96)  | 0.000                       | 1.68(1.26,2.23) | 0.000                       |

Abbreviations: ARDS, Acute respiratory distress syndrome; DIC, disseminated intravascular coagulation; HR, Hazard ratio; CI, Confidence interval.

\*The adjusted variables included age, gender, comorbid diabetes, cerebrovascular diseases, and chronic renal disease.

<sup>†</sup>The *P* values were calculated based on Cox proportional hazard model.

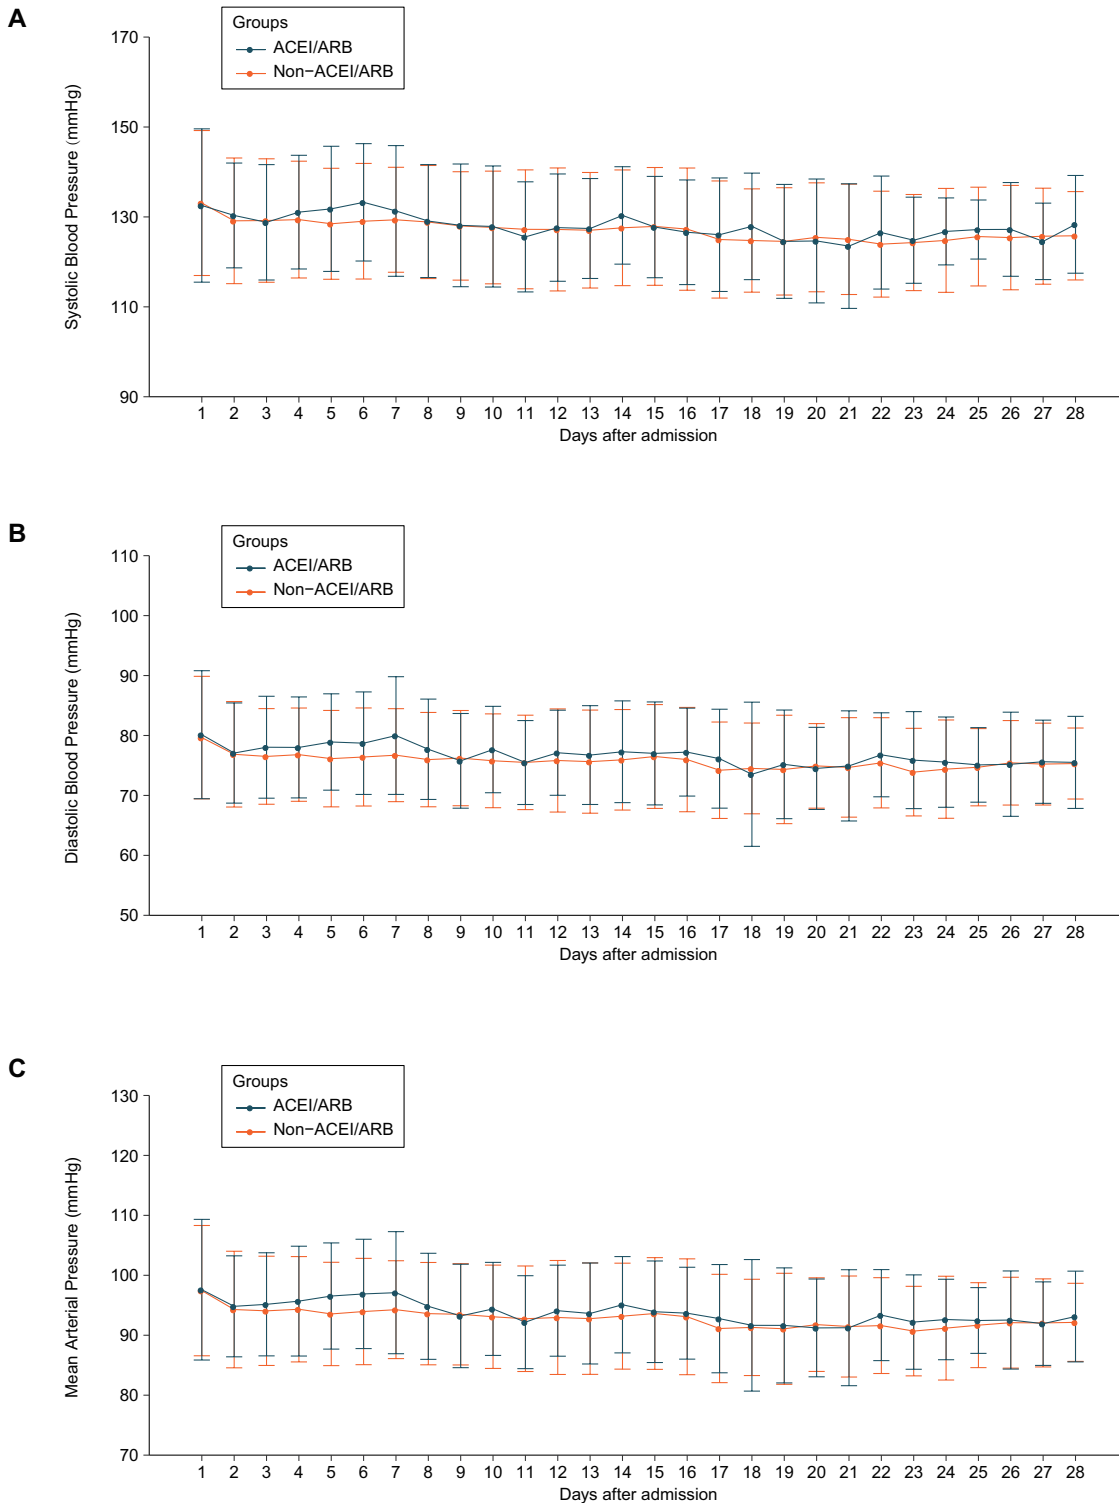

**Online Figure I** Dynamic change of blood pressure and mean arterial pressure of patients with hypertension treated with ACEI/ARB or without ACEI/ARB. (A-C) The systolic pressure (A), diastolic pressure (B), and mean arterial pressure (C) of patients with hypertension in a 28-day follow-up duration from admission.

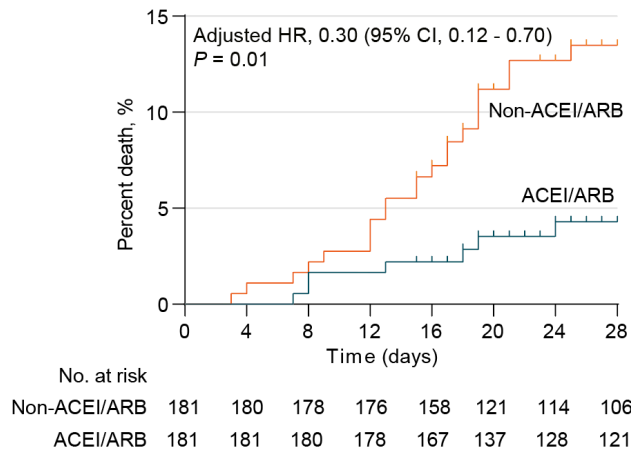

**Online Figure II.** Kaplan-Meier Curves for cumulative probability of COVID-19 mortality among individuals with inpatient use of ACEI/ARB (ACEI/ARB cohort) or taking other antihypertensive drugs (non-ACEI/ARB cohort) in propensity score-matched analysis. The blips indicate censoring. The median (IQR) observation time was 28 (20-28) in ACEI/ARB cohort and 28 (18-28) in non-ACEI/ARB cohort.

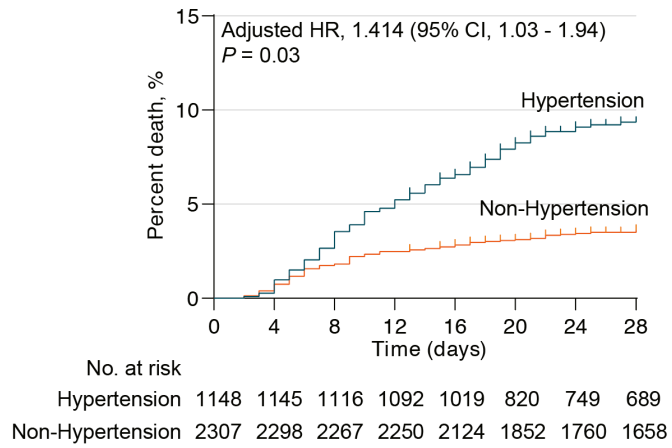

**Online Figure III.** The 28-day Kaplan-Meier Curves of hypertensive and non-hypertensive cohort. The blips indicate censoring. Patients with hypertensive status were identified according to their electronic medical record and disease history.
